# Supplementary material for: Phosphate enhance recovery from wastewater by mechanism analysis and optimization of struvite settleability in fluidized bed reactor
Source: PubMed Central journal article supplement (PMC5004189; doi:10.1038/srep32215), 2016-08-30
Supplement: srep32215-s1.pdf [file srep32215-s1.pdf]

**Supplementary Information:**

**Phosphate enhance recovery from wastewater by mechanism analysis  
and optimization of struvite settleability in fluidized bed reactor**

**Ci Fang<sup>1</sup>, Tao Zhang<sup>1,\*</sup>, Rongfeng Jiang<sup>1</sup>, Hisao Ohtake<sup>2</sup>**

<sup>1</sup>Key Laboratory of Plant-Soil Interactions of Ministry of Education, College of Resources and Environmental Sciences, China Agricultural University, Beijing 100193, China

<sup>2</sup>Research Institute for Phosphorus Atlas, Waseda University, Osaka 565-0871, Japan

**\*Corresponding author:**

Tao Zhang

Tel: 86-010-62733638

E-mail: [taozhang@cau.edu.cn](mailto:taozhang@cau.edu.cn)

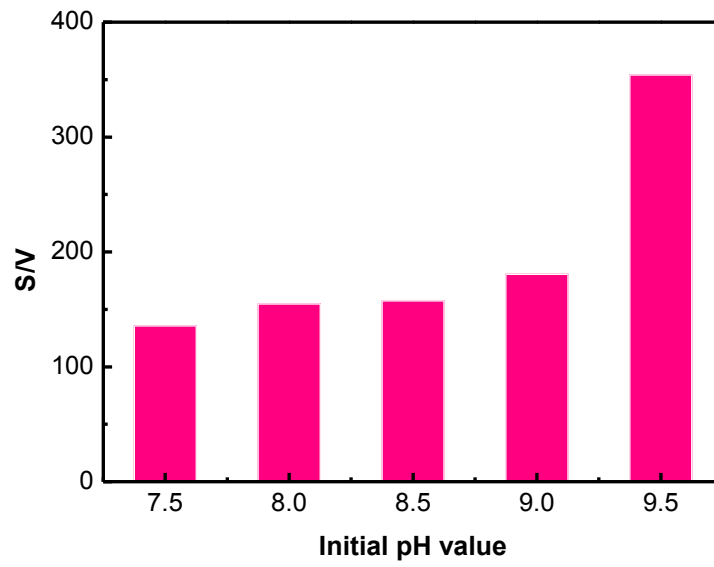

**Supplementary Figure 1. Shading degree (S) per unit volume (V) of struvite turbid liquid ( detected by the Mastersizer detector) at different initial pH value.**

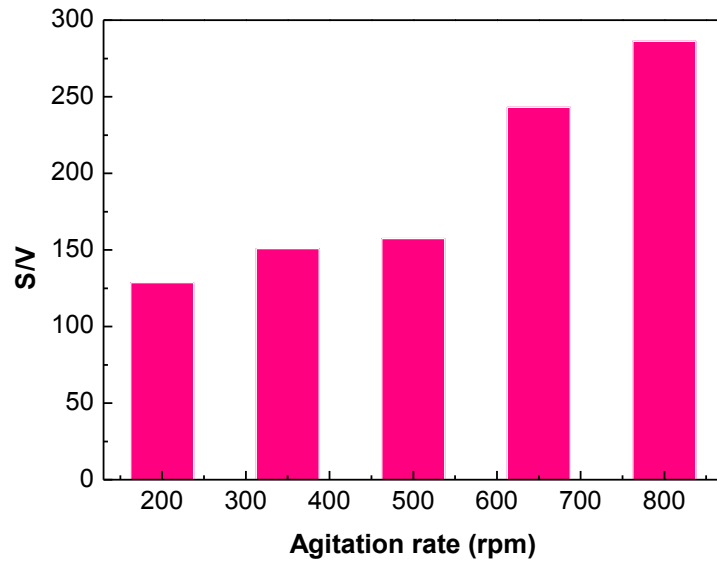

**Supplementary Figure 2. Shading degree (S) per unit volume(V) of struvite turbid liquid at different agitation rate.**

## Polynomial model

The basic formula of polynomial model is as follows:

$$P_S = C + a_1X_1 + a_2X_2 + a_3X_3 + \dots + a_nX_n + b_1(X_1 - c_1)^2 + b_2(X_2 - c_2)^2 + b_3(X_3 - c_3)^2 + \dots + b_n(X_n - c_n)^2 \quad (S1)$$

where  $X_1$  to  $X_n$  represent the impact factors, such as initial concentration of phosphate, pH value and so on; the  $C$ ,  $a_1$  to  $a_n$  and  $b_1$  to  $b_n$  are constants of constant term, the first degree term and quadratic term, respectively.

Finally, the model was established by the least-squares method and the formula was as follows:

$$P_S = -37160.45 - 3244.01v_f - 14.66pH - 0.1439C_P - 0.04444A_r + 26.35T + 27.50\rho + 2423.45\mu + 0.04817t + 9.561 \times 10^6 \times (v_f - 1.071 \times 10^{-3})^2 - 9.496 \times (pH - 8.5)^2 - 3.102 \times 10^{-4} \times (t - 123.7)^2 \quad (S2)$$

where,  $v_f$  is the inlet flow velocity (m/s),  $pH$  is the initial pH value,  $C_P$  is the initial concentration of P (mg/L),  $A_r$  is the agitation rate (rpm),  $T$  is the reaction temperature (K) and  $t$  is the reaction time (min). Analysis of variance was further applied to evaluate the significance and adequacy of the model and identify the complex relationship between factors and parameters. The results are summarized in Table S1 and the comparison results between tested and predicted ones of ten tests in random are shown in Figure.S3. Compared the correlation coefficients ( $R^2=0.9435$ ) and the astringency with logistic model, the fitness of logistic model is better than polynomial model and the struvite-settling percentage predicted by polynomial model would be out of the valid range (from 0% to 100%) under some factors. So the logistic model was a better one comparatively.

**Supplementary Table 1. ANOVA for struvite-settling percentage prediction by the polynomial model**

| Process Parameters | Prob. >   $t$   <sup>a</sup> | Process Parameters | Prob. >   $t$ |
|--------------------|------------------------------|--------------------|---------------|
| $R^2$              | 0.9435                       | $C_P$              | <.0001(-)     |
| $v_f$              | <.0001(-) <sup>b</sup>       | $pH$               | <.0001(-)     |
| $v_f^2$            | <.0001(+)                    | $A_r$              | <.0001(-)     |
| $\rho$             | <.0001(+)                    | $pH^2$             | <.0001(-)     |
| $T$                | <.0001(+)                    | $t^2$              | <.0001(-)     |
| $\mu$              | <.0001(+)                    | $t$                | 0.0002(+)     |

a A probability  $t$  value ("Prob. > | $t$ |") less than 0.05 indicates that the parameter has a significant meaning to the model.

b (+) indicates a positive influence and (-) a negative influence on the struvite-settling percentage.

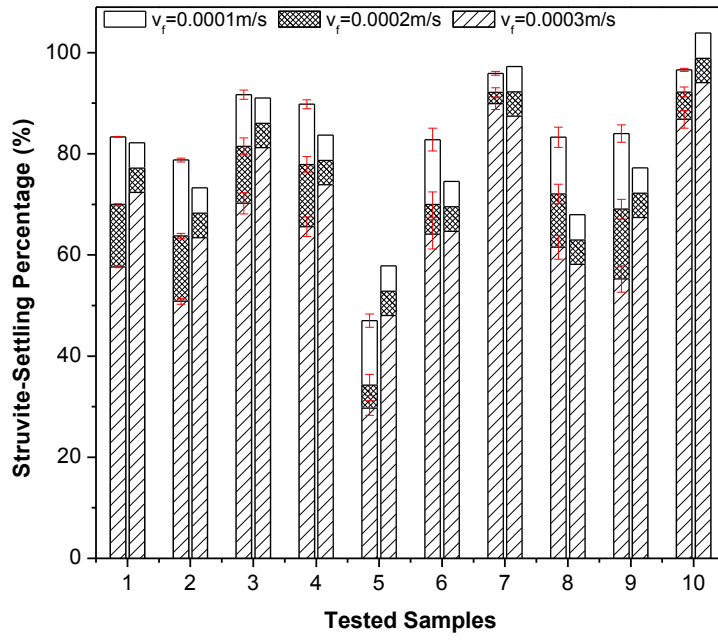

**Supplementary Figure 3. The contrast of simulation values and measured values of struvite-settling percentage by the polynomial model.**

## Fluid density and viscosity measurements

The fluid after reactions had been collected to test the fluid density and viscosity at a specified temperature. The density of fluid was calculated by the expression:

$$\rho_f = \frac{m_f}{V_f} \quad (\text{S3})$$

where  $\rho_f$  is the density of fluid,  $\text{kg/m}^3$ ;  $m_f$  is the quality of fluid, kg;  $V_f$  is the volume of the corresponding quality,  $\text{m}^3$ . By measuring a certain volume of fluid by the transfer pipette to a beaker in the electronic balance (0.0001g precision, ME204, Shanghai, China) as soon as possible, the density of fluid could be calculated. The viscosity of fluid at a specified temperature could be measured by viscometer (NDJ-5S, Shanghai, China). All the measurements were repeated three times and the average values were calculated.

The measured densities and viscosities of the fluid at different reaction temperatures ( $T$ ) and different initial phosphorus concentrations ( $C_P$ ) are shown in Table S2.

**Supplementary Table 2. The measured densities and viscosities of fluid at different reaction temperatures ( $T$ ) and initial phosphorus concentrations ( $C_P$ )**

| T   | $C_P$  | $\rho_f$            | $\mu$        |
|-----|--------|---------------------|--------------|
| (K) | (mg/L) | ( $\text{kg/m}^3$ ) | (Pa s)       |
| 294 |        | 995.41 ±0.29        | 0.972 ±0.007 |
| 301 |        | 994.17 ±0.24        | 0.908 ±0.004 |
| 308 | 620    | 993.36 ±0.16        | 0.848 ±0.003 |
| 315 |        | 991.95 ±0.24        | 0.793 ±0.008 |
| 322 |        | 988.76 ±0.60        | 0.742 ±0.003 |
|     | 155    | 989.48 ±0.16        | 0.875 ±0.005 |
|     | 310    | 990.37 ±0.57        | 0.853 ±0.004 |
| 308 | 620    | 993.36 ±0.16        | 0.848 ±0.003 |
|     | 930    | 994.89 ±0.62        | 0.84 ±0.000  |
|     | 1240   | 995.9 ±0.61         | 0.86 ±0.000  |

Both temperature and initial concentration of P would influence the density of fluid. Principal component analysis (PCA) and least square method were used in the SAS software to establish the prediction model of density. The response surface is shown in Figure.S4 and its expression is as

followed:

$$\rho_f = 505.24 + 3.354T + 0.01164C_p - 0.0058T^2 - 3.952 \times 10^{-6}C_p^2 \quad R^2=0.974 \quad (S4)$$

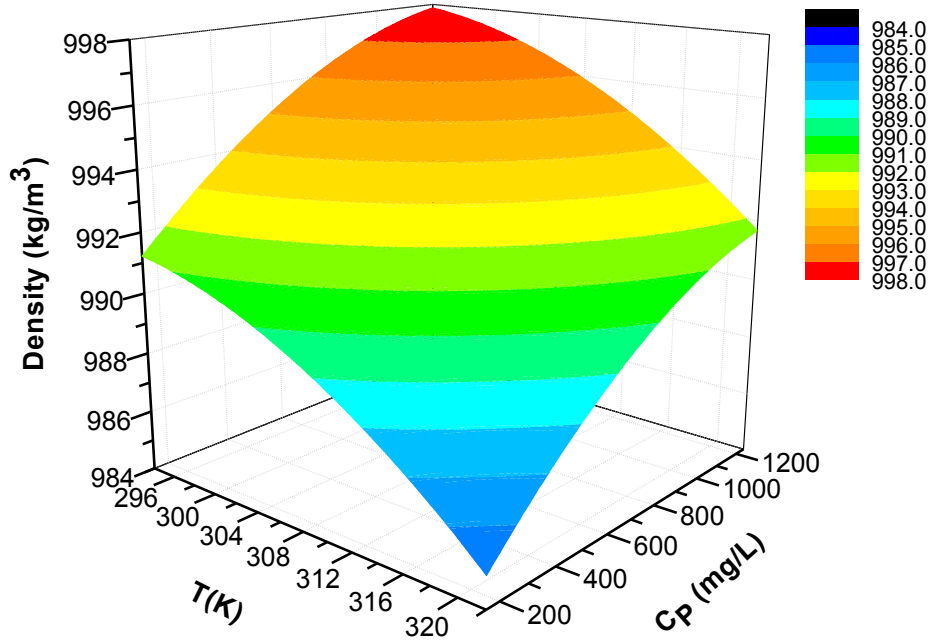

**Supplementary Figure 4. The density of fluid changed by temperature and initial phosphorus concentration**

Heridary et al. (2011) established an exponential model for simulating the relationship between temperature and viscosity<sup>25</sup>. The basic model becomes:

$$\mu = Ae^{\frac{B}{T}} \quad (S5)$$

where,  $A$  and  $B$  are constant. So the prediction model of fluid's viscosity could be expressed as:

$$\mu = 0.044e^{\frac{910.13}{T}} \quad R^2=0.999 \quad (S6)$$

Based on the high correlation coefficients ( $R^2=0.999$ ), Eq.S6 had good fitness and could be used to predict the viscosity of fluid.

**Supplementary Table 3. Parameters of samples for model validation**

| Samples | $T$<br>(K) | $C_p$<br>(mg/L) | $\rho$<br>(kg/m <sup>3</sup> ) | $\mu$<br>(mPa s) | $T$<br>(min) | $Ar$<br>(rpm) | $pH$ |
|---------|------------|-----------------|--------------------------------|------------------|--------------|---------------|------|
| 1       | 313        | 620             | 992.39                         | 0.806            | 180          | 750           | 9.0  |
| 2       | 298        | 620             | 995.25                         | 0.933            | 180          | 750           | 9.0  |
| 3       | 308        | 655             | 993.86                         | 0.845            | 240          | 500           | 9.0  |
| 4       | 308        | 655             | 993.86                         | 0.845            | 360          | 500           | 9.0  |
| 5       | 308        | 185             | 989.95                         | 0.845            | 240          | 500           | 8.5  |
| 6       | 308        | 255             | 990.65                         | 0.845            | 240          | 500           | 8.5  |
| 7       | 308        | 620             | 993.63                         | 0.845            | 360          | 450           | 7.5  |
| 8       | 308        | 620             | 993.63                         | 0.845            | 360          | 450           | 9.5  |
| 9       | 308        | 620             | 993.63                         | 0.845            | 240          | 1100          | 8.5  |
| 10      | 308        | 620             | 993.63                         | 0.845            | 240          | 350           | 8.5  |



**The equation calculating the dielectric constant  $\varepsilon$  is expressed as follow:**

$$\varepsilon \cong 78.54\{1 - [0.004579(T - 298)] + 11.9 \times 10^{-6}(T - 298)^2 + [28 \times 10^{-9}(T - 298)^3]\} \quad (S7)$$

where,  $T$  is the absolute temperature, K.

**The equation calculating the ionic strength of solution  $I$  (mol/L) is expressed as follow:**

$$I = \frac{1}{2} \sum C_i Z_i^2 \quad (S8)$$

where,  $C_i$  stands for the concentration of ion  $i$  in the solution;  $Z_i$  is the number of replaceable hydrogen atoms or their equivalent.
